# Supplementary material for: Major surgery induces acute changes in measured DNA methylation associated with immune response pathways
Source: PubMed Central journal article supplement (PMC7113299; doi:10.1038/s41598-020-62262-x), 2020-04-01
Supplement: 41598_2020_62262_MOESM3_ESM.pdf [file 41598_2020_62262_MOESM3_ESM.pdf]

## **Supplementary Table Legends**

### **Supplementary Table S1 - Acute changes in DNA methylation following major surgery.**

Shown are DMPs ( $P < 5.0E-05$ ) identified in an analysis comparing baseline (BL) PBMC samples to those at post-operative day 1 (POD1). DMP = differentially methylated position; POD1 = post-operative day1; Position = location of DMP (hg19); chr = chromosome; GREAT annotation = genes annotated to each DMP using GREAT with distance from transcription start site; BL DNAm = average DNA methylation level at baseline; DNAm change = average surgery-induced DNA methylation change.

### **Supplementary Table S2 – Differentially methylated regions characterized by acute changes following major surgery.**

Sidak P-values were calculated according to Stouffer-Liptak-Kechris and Sidak correction by *comb-p*. DMR = differentially methylated region; BL = baseline; POD1 = post-operative day1; chr = chromosome; nProbes = number of probes included in specified DMR.

### **Supplementary Table S3 - Gene ontology (GO) term enrichment analysis on genes annotated to DMPs associated with major surgery.**

GO = gene ontology; DMP = differentially methylated position; POD1 = post-operative day 1; nGenes = number of genes in each GO pathway; nTest = number of tested genes in each GO category annotated to DMPs ( $P < 5.0E-5$ ).

### **Supplementary Table S4 - The acute changes in DNA methylation at sites annotated to immune system genes paralleled changes in blood cell proportions.**

Shown are levels of blood serum and blood cell counts at each time-point quantified in individuals included in our DNA methylation study. Differences were identified using a paired t-test for POD1 and POD4/7 compared to BL. BL = baseline; POD1 = postoperative day 1; POD4/7 = postoperative day 4 – 7; n = number of patients.

### **Supplementary Table S5 – Cell proportion estimates derived from DNA methylation data highlight shifts associated with major surgery.**

Alterations from baseline were tested at POD1 and POD4/7 using a paired t-test. \*4 participants had missing data regarding actual levels of lymphocyte/monocyte ratios.

### **Supplementary Table S6 - Acute changes in DNA methylation following major surgery, correcting for derived blood cell proportions.**

Shown are DMPs ( $P < 5.0E-05$ ) identified in an analysis comparing baseline PBMC samples to those at POD1. DMP = differentially methylated position; POD1 = post-operative day1; Position = location of DMP (hg19); chr = chromosome; GREAT annotation = annotated genes with distance from transcription start site; BL DNAm = average DNA methylation level at baseline; DNAm change = average surgery-induced DNA methylation change.

### **Supplementary Table S7 - Differentially methylated regions characterized by acute changes following major surgery in a model correcting for derived blood cell proportions.**

DMR = differentially methylated region; BL = baseline; POD1 = postoperative day1; POD4/7 = postoperative day 4 – 7; chr = chromosome; Beta = average of surgery-induced DNA methylation change. BL DNAm = average DNA methylation level at baseline; DNAm change = average surgery-induced DNA methylation change.

**Supplementary Table S8 - Gene ontology (GO) term enrichment analysis on genes annotated to DMPs at POD1 following major surgery in a model correcting for blood cell heterogeneity.**

GO = gene ontology; DMP = differentially methylated position; POD1 = post-operative day 1; nGenes = number of genes in each GO pathway; nTest = number of tested genes in each GO category annotated to DMPs ( $P < 5.0E-5$ ).

**Supplementary Table S9 – Surgery-induced changes in DNA methylation associated with shifts in serum IL-6 levels.**

Shown are DMPs ( $P < 5.0E-05$ ) identified in an analysis comparing baseline PBMC samples to those at POD1. DMP = differentially methylated position; POD1 = post-operative day1; Position = location of DMP (hg19); chr = chromosome; GREAT annotation = genes annotated to each DMP using GREAT with distance from transcription start site; DNAm change per 10 pg/ml = average of surgery-induced DNA methylation change per10 pg/ml IL-6.

**Supplementary Table S10 - Persistent changes in DNA methylation following major surgery, correcting for blood cell heterogeneity.**

Shown are DMPs ( $P < 5.0E-05$ ) identified in an analysis comparing baseline PBMC samples to those at POD4/7. DMP = differentially methylated position; POD4/7 = post-operative day4 - 7; Position = location of DMP (hg19); chr = chromosome; GREAT annotation = genes annotated to each DMP using GREAT with distance from transcription start site; BL DNAm = average DNA methylation level at baseline; DNAm change = average surgery-induced DNA methylation change.

**Supplementary Table S11 - Gene ontology (GO) term enrichment analysis on genes annotated to DMPs at POD4/7 following major surgery in a model correcting for blood cell heterogeneity.**

GO = gene ontology; DMP = differentially methylated position; POD1 = post-operative day 1; nGenes = number of genes in each GO pathway; nTest = number of tested genes in each GO category annotated to DMPs ( $P < 5.0E-5$ ).

**Supplementary Table S12 – Surgery-type-specific DMPs at POD1.**

Shown are DMPs ( $P < 2.0E-07$ ) identified in an analysis comparing the surgery-type-specific DNA methylation change from baseline to POD1. DMP = differentially methylated position; POD1 = post-operative day1; Position = location of DMP (hg19); chr = chromosome; GREAT annotation = annotated genes with distance from transcription start site; BL DNAm = average of DNA methylation at baseline; DNAm change = average of surgery-induced DNA methylation change; Surgery type P value = P values calculated by analysis of variance among patients undergoing colorectal, hip elective, and hip fracture surgery.

**Supplementary Table S13 - Surgery-type-specific DMPS at POD4/7.**

Shown are DMPs ( $P < 2.0E-07$ ) identified in an analysis comparing the surgery-type-specific DNA methylation change from baseline to POD4/7. DMP = differentially methylated position; POD1 = post-operative day1; Position = location of DMP (hg19); chr = chromosome; GREAT annotation = annotated genes with distance from transcription start site; BL DNAm = average of DNA methylation at baseline; DNAm change = average of surgery-induced DNA methylation change; Surgery type P value = P values calculated by analysis of variance among patients undergoing colorectal, hip elective, and hip fracture surgery.

**Supplementary Table S14 - Oligo primers used in our bisulfite-pyrosequencing validation experiments.**
